# Supplementary material
Source: PubMed Central journal article supplement (PMC2234183)

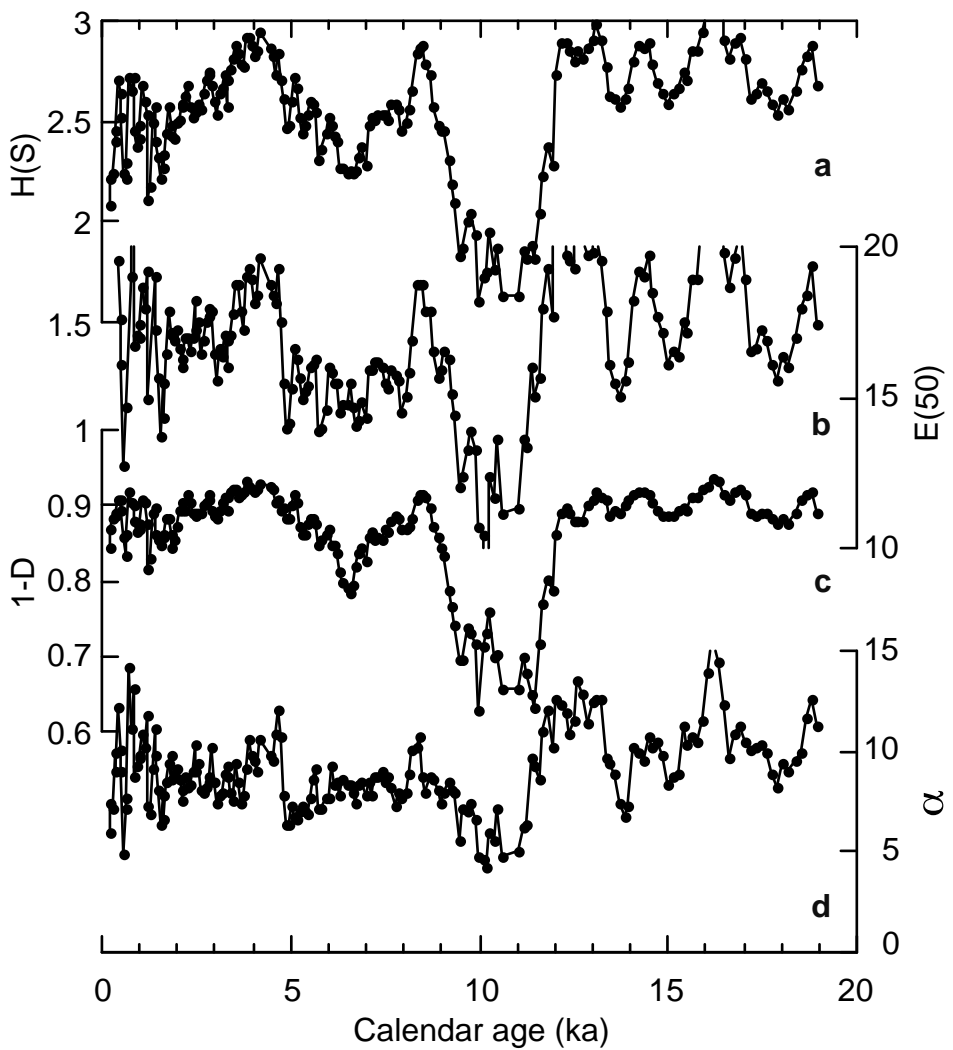

Supplement: pnas_0705486105_1.pdf [file pnas_0705486105_1.pdf]
